# Supplementary material
Source: PubMed Central journal article supplement (PMC5805957)

Type II Cuckolding vs  
Type I Courting

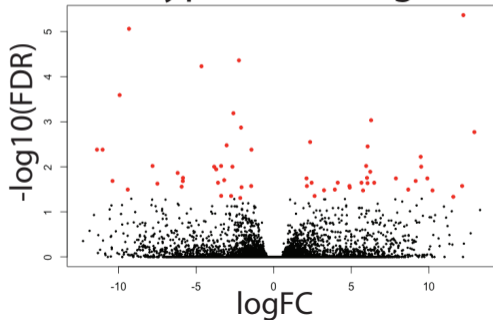

Type II Cuckolding vs  
Type I Cuckolding

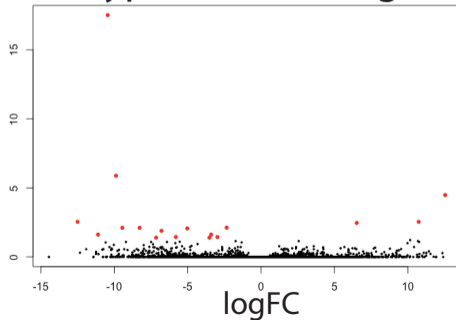

Type I Cuckolding vs  
Type I Courting

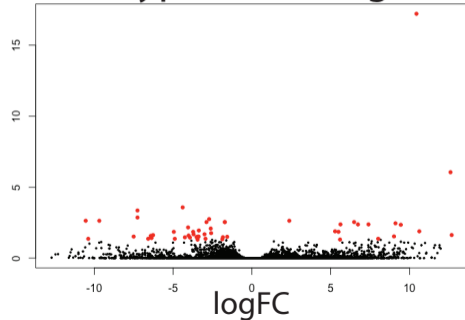

Supplement: rspb20172742supp4.pdf [file rspb20172742supp4.pdf]
